# Supplementary material for: Elucidating interfacial charge-transfer dynamics of Ti3C2Tx electrodes via advanced distribution of relaxation times (DRT) analysis
Source: Royal Society of Chemistry journal article supplement (doi:10.1039/d5na01183c), 2026-04-01
Supplement: d5na01183c1.pdf [file d5na01183c1.pdf]

## Elucidating Interfacial Charge-Transfer Dynamics of $Ti_3C_2T_x$ Electrodes via Advanced Distribution of Relaxation Times (DRT) Analysis

Arya Kannathvalappil<sup>a,b,†</sup>, Kaifee Sayeed<sup>a,c,†</sup>, Baptiste Py<sup>d</sup>, Sabiar Rahaman<sup>a</sup>, Francesco Ciucci<sup>e,f,\*</sup>, Kavita Pandey<sup>a,b,c,\*</sup>

<sup>a</sup> Centre for Nano and Soft Matter Sciences (CeNS), Shivanapura, Bengaluru 562162, India

<sup>b</sup> Academy of Scientific and Innovative Research (AcSIR), Ghaziabad 201002, India

<sup>c</sup> Manipal Academy of Higher Education, Manipal, Karnataka, 576104, India

<sup>d</sup> Department of Mechanical and Aerospace Engineering, The Hong Kong University of Science and Technology, Hong Kong SAR, China

<sup>e</sup> University of Bayreuth, Chair of Electrode Design for Electrochemical Energy Systems, Weiherstraße 26, 95448 Bayreuth, Germany

<sup>f</sup> University of Bayreuth, Bavarian Center for Battery Technology (BayBatt), Universitätsstraße 30, 95447 Bayreuth, Germany

**Table S1.** The inter-planar separation (d-spacing ) of  $Ti_3AlC_2$  MAX phase and  $Ti_3C_2T_x$  MXene calculated with Bragg's law.

| $Ti_3AlC_2$ (MAX Phase) |            | $Ti_3C_2T_x$ (MXene) |            |
|-------------------------|------------|----------------------|------------|
| $2\theta$               | d- Spacing | $2\theta$            | d- Spacing |
| 9.57706                 | 9.227542   | 8.92692              | 9.898064   |
| 12.80438                | 6.908092   | 18.33966             | 4.833668   |
| 19.17237                | 4.625565   | 23.00505             | 3.862874   |
| 33.98769                | 2.635586   | 25.56701             | 3.481303   |
| 34.98404                | 2.562772   | 27.74141             | 3.213176   |
| 35.98039                | 2.494057   | 35.10773             | 2.554026   |
| 36.73849                | 2.444313   | 37.22321             | 2.413589   |
| 38.96945                | 2.309361   | 41.15307             | 2.191725   |
| 41.98016                | 2.150437   | 41.5186              | 2.17327    |
| 43.21477                | 2.091817   | 42.74418             | 2.113751   |
| 45.20748                | 2.004134   | 43.34321             | 2.085916   |
| 48.56475                | 1.873143   | 52.49351             | 1.741823   |
| 52.94004                | 1.728178   | 57.55191             | 1.600172   |
| 56.55723                | 1.62593    | 62.05853             | 1.494347   |
| 60.28272                | 1.534049   | 65.61571             | 1.421681   |
| 65.5244                 | 1.423441   | 75.11873             | 1.263651   |
| 70.63611                | 1.332434   |                      |            |
| 73.99323                | 1.280062   |                      |            |

**Table S2.** EDS data of aluminum etching obtained from FESEM EDS.

| Condition      | Atomic wt. % of Aluminium |
|----------------|---------------------------|
| Before etching | 18.29%                    |
| After etching  | 0.83%                     |

**Table S3.** Capacitance values calculated from the CV curve at 50 mVs<sup>-1</sup> for each electrolyte and each substrate given an effective area of the electrode of 1cm<sup>2</sup>.

| S. No. | Electrolyte/Substrate           | Capacitance (mF/cm <sup>2</sup> ) |
|--------|---------------------------------|-----------------------------------|
| 1.     | H <sub>2</sub> SO <sub>4</sub>  | 89.36                             |
| 2.     | Na <sub>2</sub> SO <sub>4</sub> | 126.67                            |
| 3.     | KOH                             | 0.24                              |
| 4.     | FTO                             | 68.95                             |
| 5.     | Carbon Paper                    | 119.48                            |
| 6.     | Nickel Foam                     | 176.29                            |

**Table S4.** Comparative analysis of the per-unit cost of electrolytes (1 M H<sub>2</sub>SO<sub>4</sub>, 1 M Na<sub>2</sub>SO<sub>4</sub>, and 1 M KOH; calculated per 20 mL) and substrates (FTO, carbon paper, and nickel foam; calculated per cm<sup>2</sup>) used in this study.

| S. No. | Electrolyte/ Substrate             | Source                                         | Approximate Cost (in INR) |
|--------|------------------------------------|------------------------------------------------|---------------------------|
| 1.     | 1M H <sub>2</sub> SO <sub>4</sub>  | Merck                                          | 78.8 per 20 ml            |
| 2.     | 1M Na <sub>2</sub> SO <sub>4</sub> | Merck                                          | 29.8 per 20 ml            |
| 3.     | 1M KOH                             | Merck                                          | 6.9 per 20 ml             |
| 4.     | FTO                                | Sigma Aldrich                                  | 9.4 per cm <sup>2</sup>   |
| 5.     | Carbon paper                       | Sainergy Fuel Cell<br>India Private<br>Limited | 13.6 per cm <sup>2</sup>  |
| 6.     | Nickel Foam                        | Sigma Aldrich                                  | 20.0 per cm <sup>2</sup>  |

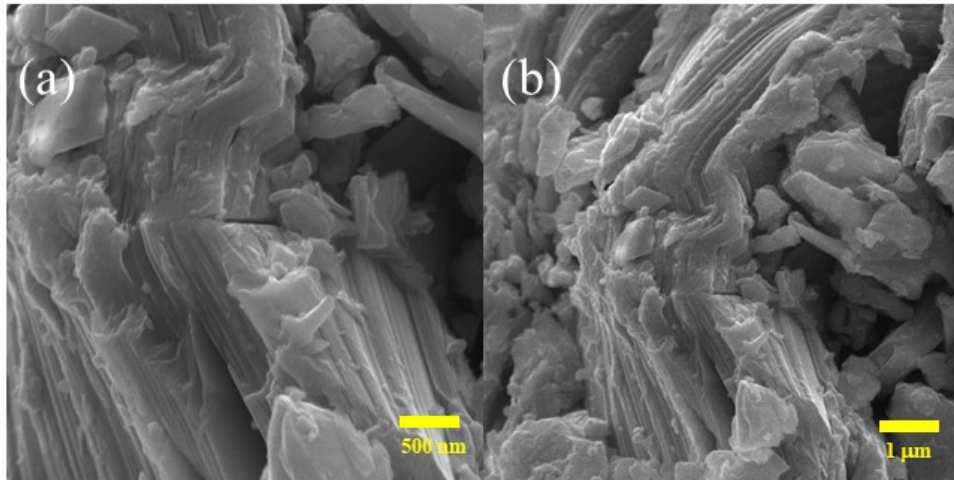

**Figure S1.**(a-b) FESEM image of the  $Ti_3AlC_2$  MAX phase at different magnifications.

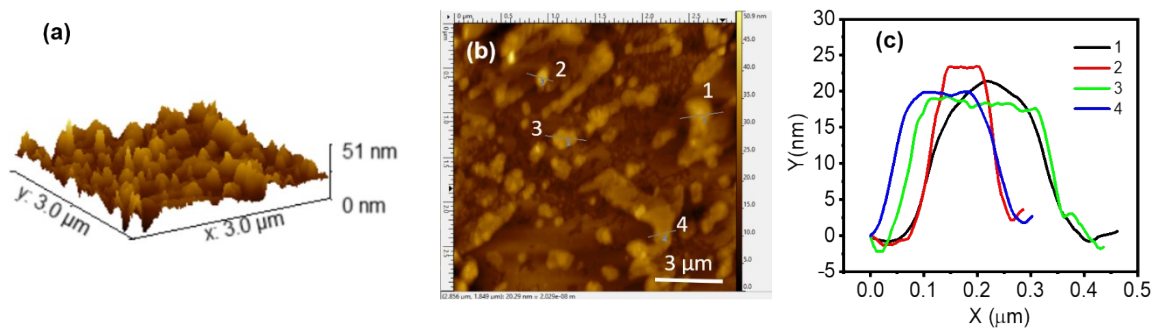

**Figure S2.** Atomic force microscopy images of  $Ti_3C_2T_x$  (a) Three-dimensional image, (b) showing four arbitrarily different selected regions for analysis, and (c) height profile corresponding to four different regions.

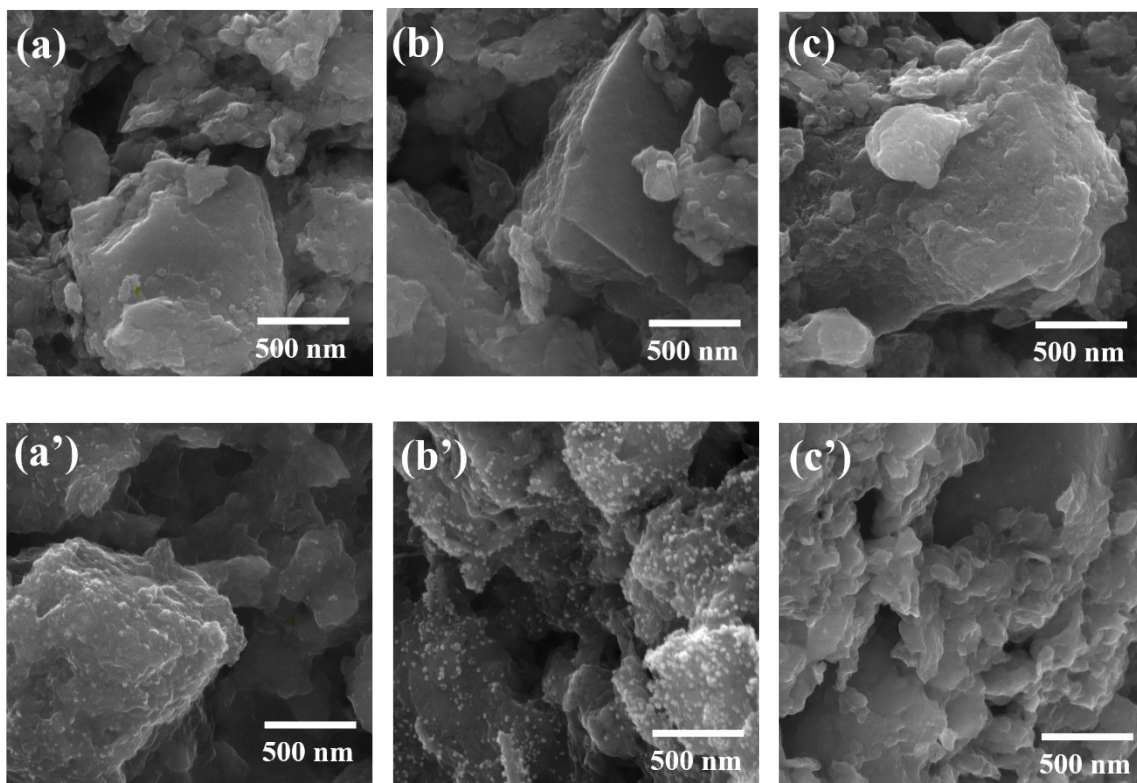

**Figure S3.** FESEM image of the electrode before and after using in (a and a')  $\text{H}_2\text{SO}_4$ , (b and b')  $\text{Na}_2\text{SO}_4$ , and (c and c')  $\text{KOH}$ .

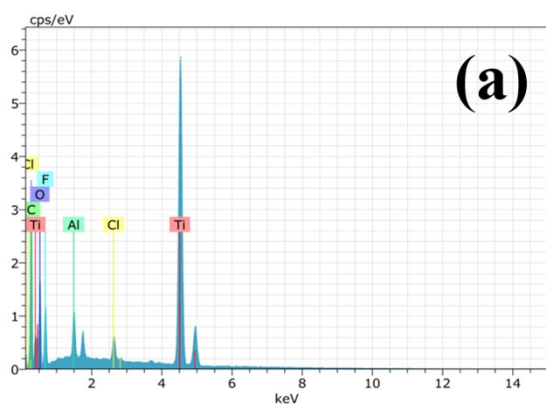

| Element   | Series   | unn. C [wt.%] | norm. C [wt.%] | Atom. C [at.%] | Error (3 Sigma) [wt.%] |
|-----------|----------|---------------|----------------|----------------|------------------------|
| Titanium  | K-series | 46.72         | 42.90          | 18.91          | 4.14                   |
| Carbon    | K-series | 24.48         | 22.48          | 39.49          | 9.25                   |
| Oxygen    | K-series | 22.35         | 20.53          | 27.07          | 9.12                   |
| Fluorine  | K-series | 12.34         | 11.33          | 12.59          | 5.27                   |
| Chlorine  | K-series | 1.25          | 1.15           | 0.68           | 0.21                   |
| Aluminium | K-series | 1.76          | 1.62           | 1.27           | 0.33                   |

Total: 108.90 100.00 100.00

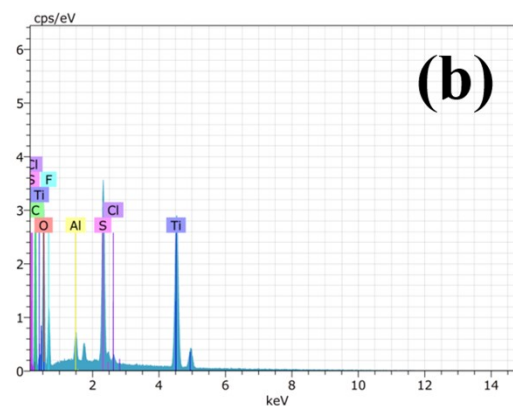

| Element   | Series   | unn. C [wt.%] | norm. C [wt.%] | Atom. C [at.%] | Error (3 Sigma) [wt.%] |
|-----------|----------|---------------|----------------|----------------|------------------------|
| Oxygen    | K-series | 30.05         | 29.57          | 33.31          | 11.43                  |
| Carbon    | K-series | 29.70         | 29.23          | 43.86          | 11.30                  |
| Titanium  | K-series | 22.98         | 22.62          | 8.52           | 2.09                   |
| Fluorine  | K-series | 9.98          | 9.82           | 9.32           | 4.32                   |
| Sulfur    | K-series | 7.54          | 7.42           | 4.17           | 0.88                   |
| Chlorine  | K-series | 0.41          | 0.40           | 0.21           | 0.13                   |
| Aluminium | K-series | 0.94          | 0.92           | 0.62           | 0.22                   |
| Hydrogen  | K-series | 0.00          | 0.00           | 0.00           | 0.00                   |

Total: 101.60 100.00 100.00

Figure S4. EDS of the electrode before (a) and after (b) using the H<sub>2</sub>SO<sub>4</sub> electrolyte.

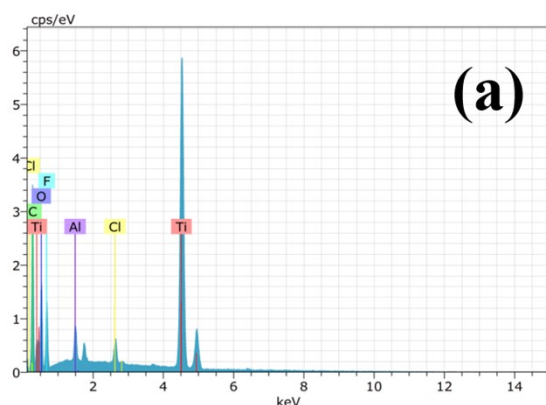

| Element   | Series   | unn. C [wt.%] | norm. C [wt.%] | Atom. C [at.%] | Error (3 Sigma) [wt.%] |
|-----------|----------|---------------|----------------|----------------|------------------------|
| Titanium  | K-series | 45.07         | 43.19          | 19.15          | 3.99                   |
| Carbon    | K-series | 22.73         | 21.78          | 38.49          | 8.60                   |
| Oxygen    | K-series | 21.31         | 20.43          | 27.10          | 8.67                   |
| Fluorine  | K-series | 12.62         | 12.09          | 13.51          | 5.31                   |
| Chlorine  | K-series | 1.22          | 1.17           | 0.70           | 0.21                   |
| Aluminium | K-series | 1.39          | 1.34           | 1.05           | 0.28                   |

Total: 104.35 100.00 100.00

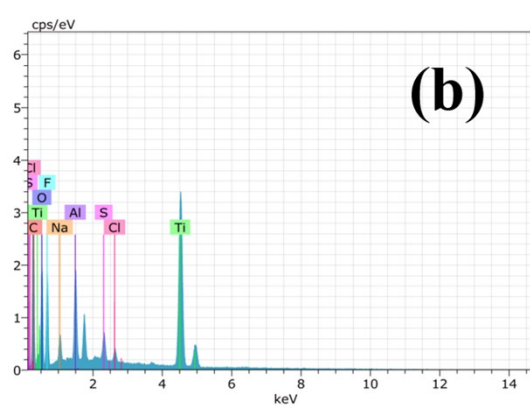

| Element   | Series   | unn. C [wt.%] | norm. C [wt.%] | Atom. C [at.%] | Error (3 Sigma) [wt.%] |
|-----------|----------|---------------|----------------|----------------|------------------------|
| Carbon    | K-series | 27.12         | 27.98          | 43.73          | 10.18                  |
| Titanium  | K-series | 27.83         | 28.71          | 11.26          | 2.51                   |
| Oxygen    | K-series | 21.07         | 21.75          | 25.52          | 8.39                   |
| Fluorine  | K-series | 15.15         | 15.63          | 15.45          | 6.10                   |
| Sodium    | K-series | 1.17          | 1.21           | 0.99           | 0.31                   |
| Aluminium | K-series | 2.87          | 2.96           | 2.06           | 0.48                   |
| Chlorine  | K-series | 0.58          | 0.60           | 0.32           | 0.14                   |
| Sulfur    | K-series | 1.13          | 1.16           | 0.68           | 0.21                   |

Total: 96.91 100.00 100.00

Figure S5. EDS of the electrode before (a) and after (b) using the Na<sub>2</sub>SO<sub>4</sub> electrolyte.

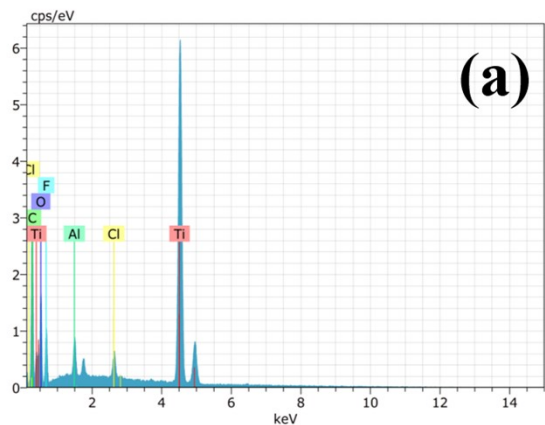

| Element   | Series   | unn. C [wt.%] | norm. C [wt.%] | Atom. C [at.%] | Error (3 Sigma) [wt.%] |
|-----------|----------|---------------|----------------|----------------|------------------------|
| Titanium  | K-series | 48.80         | 45.80          | 20.76          | 4.32                   |
| Carbon    | K-series | 22.13         | 20.77          | 37.53          | 8.43                   |
| Oxygen    | K-series | 22.55         | 21.16          | 28.71          | 9.19                   |
| Fluorine  | K-series | 10.55         | 9.90           | 11.31          | 4.62                   |
| Chlorine  | K-series | 1.20          | 1.12           | 0.69           | 0.21                   |
| Aluminium | K-series | 1.33          | 1.25           | 1.00           | 0.27                   |
| Total:    |          | 106.55        | 100.00         | 100.00         |                        |

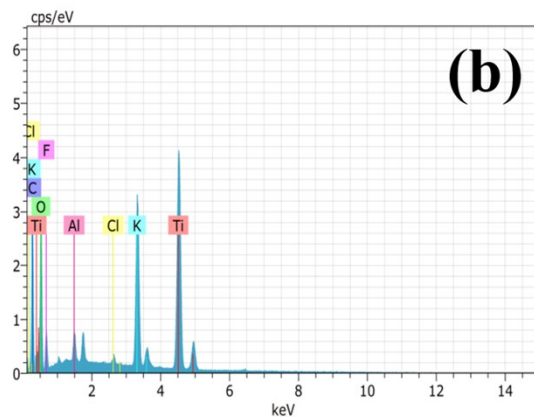

| Element   | Series   | unn. C [wt.%] | norm. C [wt.%] | Atom. C [at.%] | Error (3 Sigma) [wt.%] |
|-----------|----------|---------------|----------------|----------------|------------------------|
| Titanium  | K-series | 33.95         | 32.82          | 14.65          | 3.04                   |
| Oxygen    | K-series | 33.49         | 32.38          | 43.26          | 12.75                  |
| Carbon    | K-series | 15.61         | 15.09          | 26.86          | 6.09                   |
| Potassium | K-series | 11.45         | 11.07          | 6.05           | 1.14                   |
| Fluorine  | K-series | 7.42          | 7.18           | 8.08           | 3.45                   |
| Aluminium | K-series | 1.14          | 1.11           | 0.88           | 0.25                   |
| Chlorine  | K-series | 0.37          | 0.36           | 0.22           | 0.12                   |
| Total:    |          | 103.45        | 100.00         | 100.00         |                        |

**Figure S6.** EDS of the electrode before (a) and after (b) using the KOH electrolyte

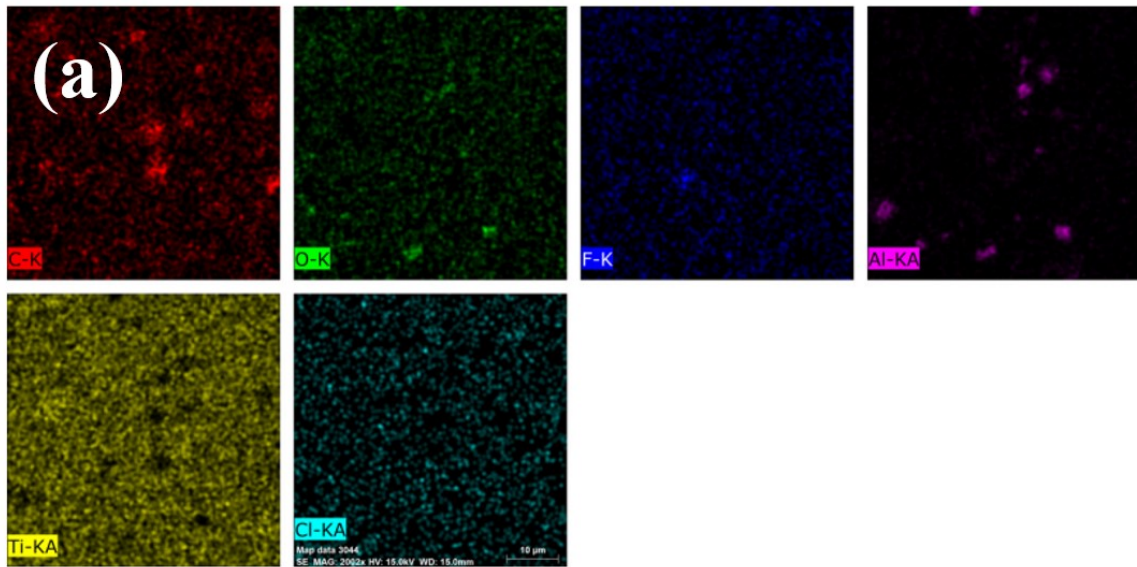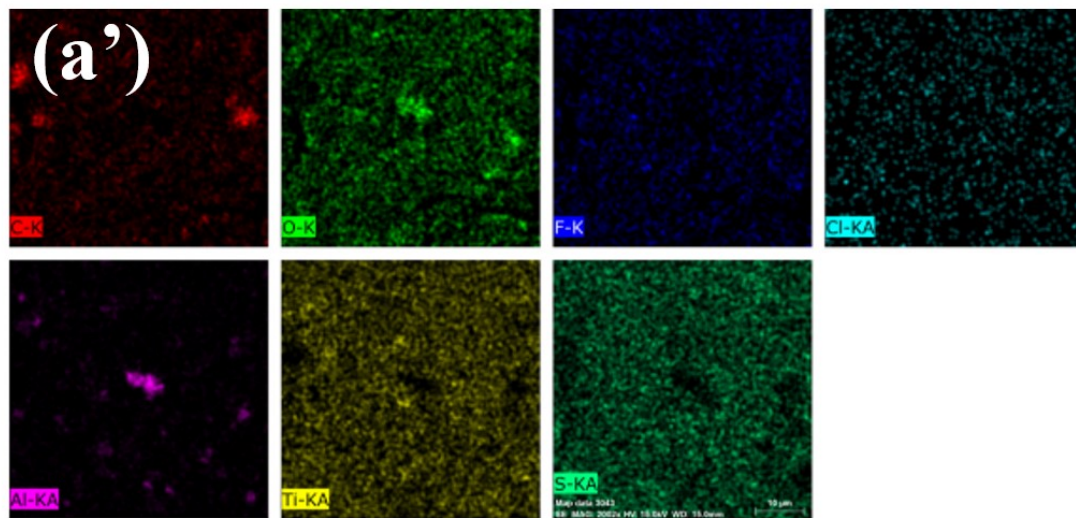

**Figure S7.** Mapping of the electrode before (a) and after (a') electrochemical experiments in  $\text{H}_2\text{SO}_4$  electrolyte.

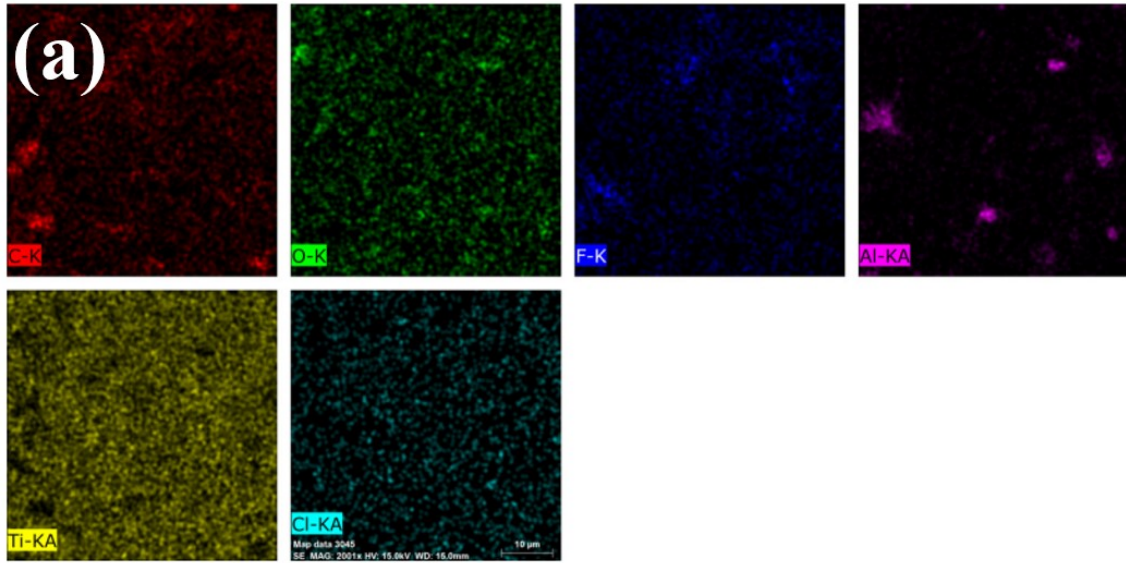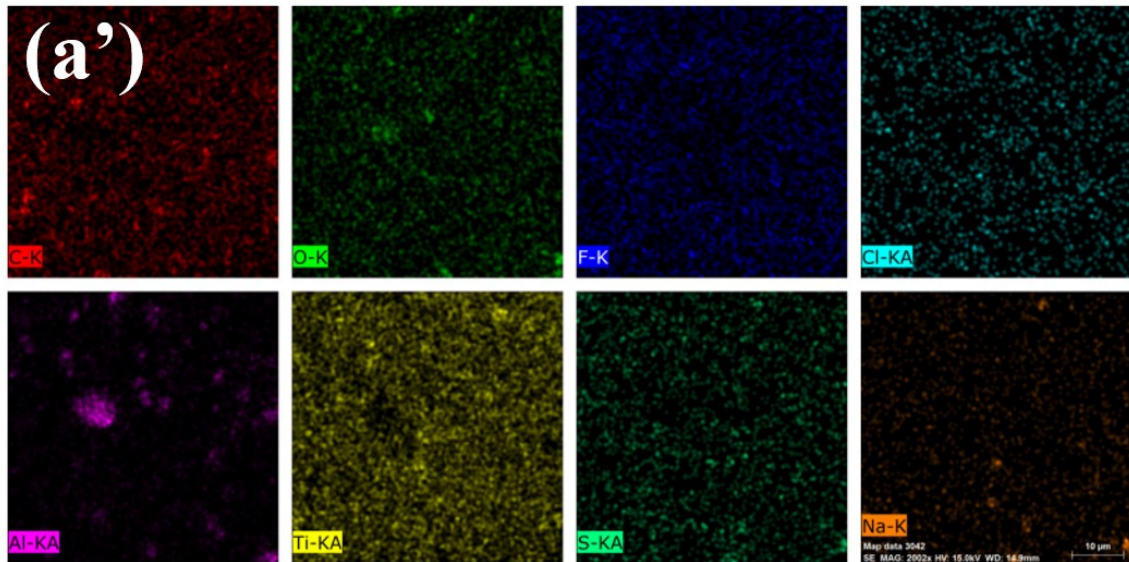

**Figure S8.** Mapping of the electrode before (a) and after (a') electrochemical experiments in  $\text{Na}_2\text{SO}_4$  electrolyte.

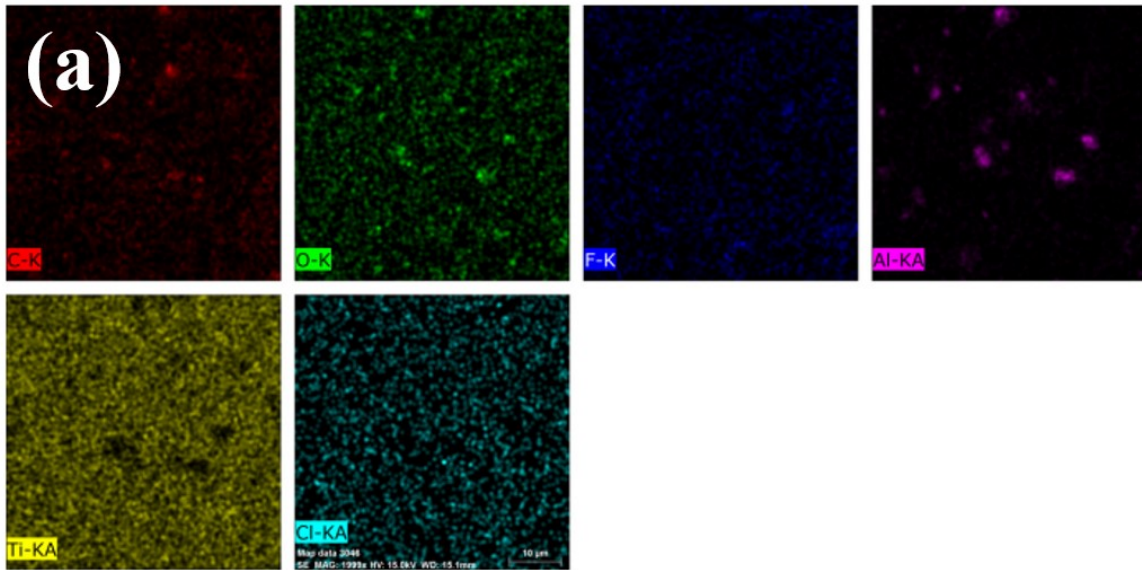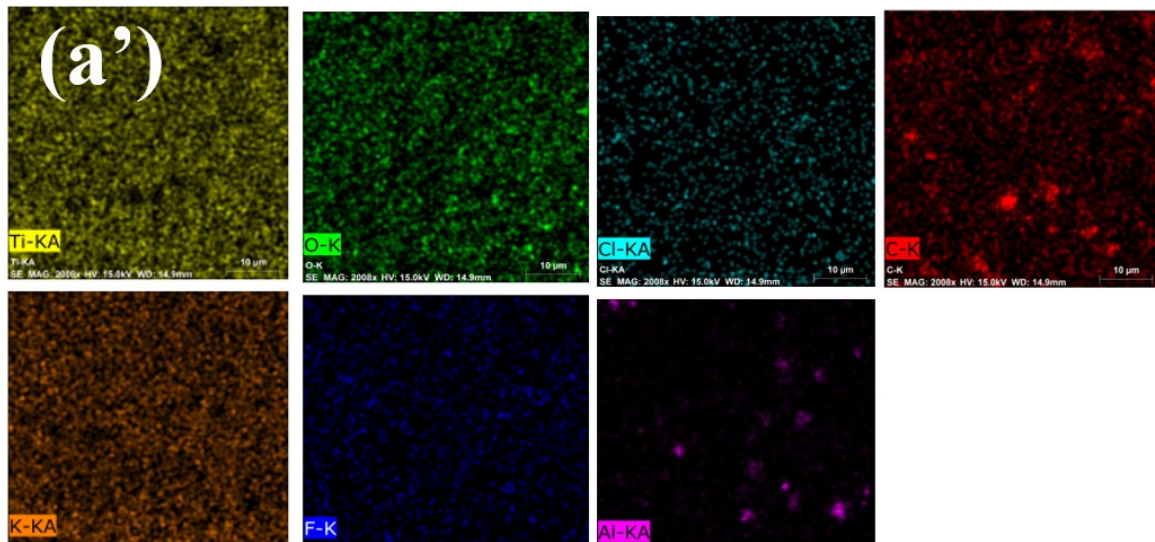

**Figure S9.** Mapping of the electrode before (a) and after (a') electrochemical experiments in KOH electrolyte.
